# Supplementary material for: Mg/Al-CO3 layered double hydroxide nanorings
Source: Royal Society of Chemistry journal article supplement (doi:10.1039/c1jm12129d), 2011-01-01
Supplement: c1jm12129d.pdf [file c1jm12129d.pdf]

# Supporting Information for

## Mg/Al-CO<sub>3</sub> Layered Double Hydroxide Nanorings

Miaosen Yang <sup>a</sup>, Junfeng Liu <sup>a</sup>, Zheng Chang\* <sup>a</sup>, Gareth R. Williams <sup>b,c</sup>, Dermot O'Hare <sup>b</sup>, Xuehan Zheng <sup>a</sup>, Xiaoming Sun\* <sup>a</sup>, and Xue Duan <sup>a</sup>

*a* State Key Laboratory of Chemical Resource Engineering, Beijing University of Chemical Technology, Beijing, 100029, P. R. China.

*b* Chemistry Research Laboratory, Department of Chemistry, University of Oxford, Mansfield Road, Oxford, OX1 3TA, U.K.

*c* School of Human Sciences, London Metropolitan University, Holloway Road, London, N7 8DB, UK.

### List of Content

#### 1. Morphological and textural characterization of Mg<sub>10</sub>(OH)<sub>18</sub>Cl<sub>2</sub>·5H<sub>2</sub>O nanowires and Mg/Al-CO<sub>3</sub> LDH nanorings

**Figure S1.** FT-IR pattern of MAC-R

**Figure S2.** XRD pattern of MAC-R calcined at 500 °C for 6 h

**Figure S3.** TEM image of MAC-R calcined at 500 °C for 6 h

#### 2. Morphologic and textural characterization of Mg/Al-CO<sub>3</sub> LDH nanoflowers

**Figure S4.** XRD pattern of MAC-F

**Figure S5.** FT-IR pattern of MAC-F

#### 3. Discussion of synthesis mechanism

**Figure S6.** TEM image of MAC-R prepared after a reaction time of 40 min

**Figure S7.** 3D stacked plot recorded for the transition of Mg<sub>10</sub>-NW into MAC-R. Reflections marked \* correspond to fluorescence from metals present inside the experimental hutch. After 150 min, the stirring mechanism jammed and no further data could be obtained.

**Figure S8.** TEM image of MAC-R prepared in pure water

**Figure S9.** XRD pattern of MAC-P

**Figure S10.** TEM image of MAC-P

1. Morphological and textural characterization of  $\text{Mg}_{10}(\text{OH})_{18}\text{Cl}_2 \cdot 5\text{H}_2\text{O}$  nanowires and Mg/Al- $\text{CO}_3$  LDH nanorings

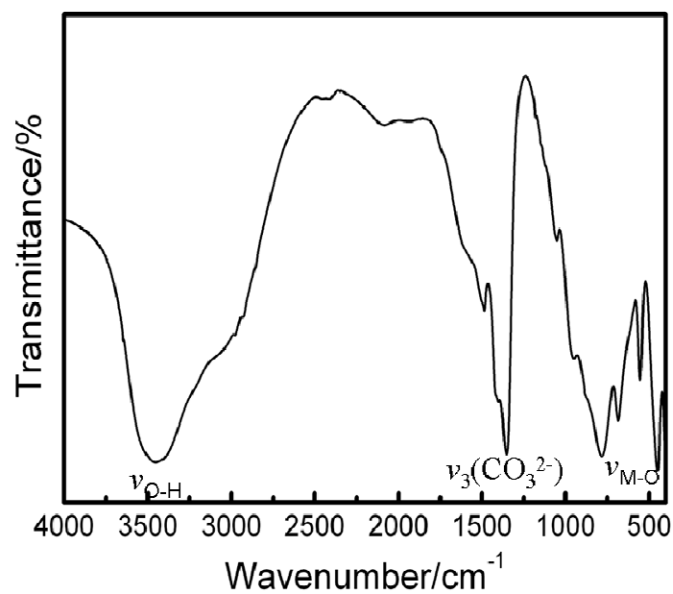

Figure S1. FT-IR pattern of MAC-R

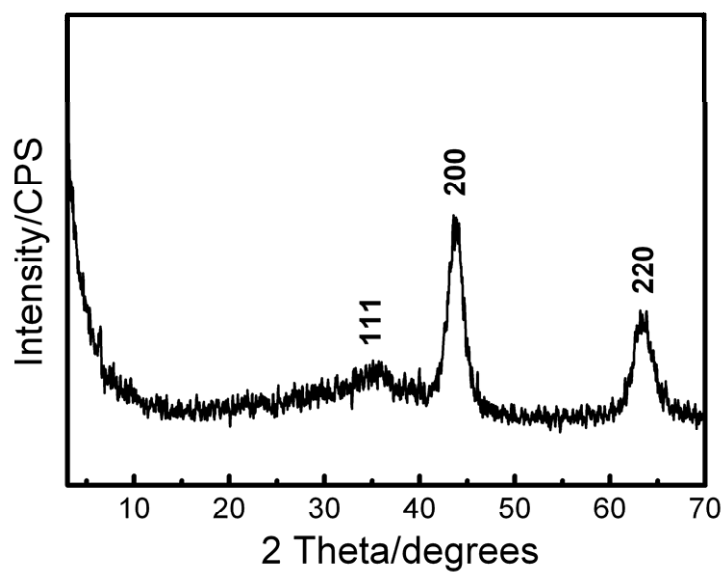

Figure S2. XRD pattern of MAC-R calcined at 500 °C for 6 h

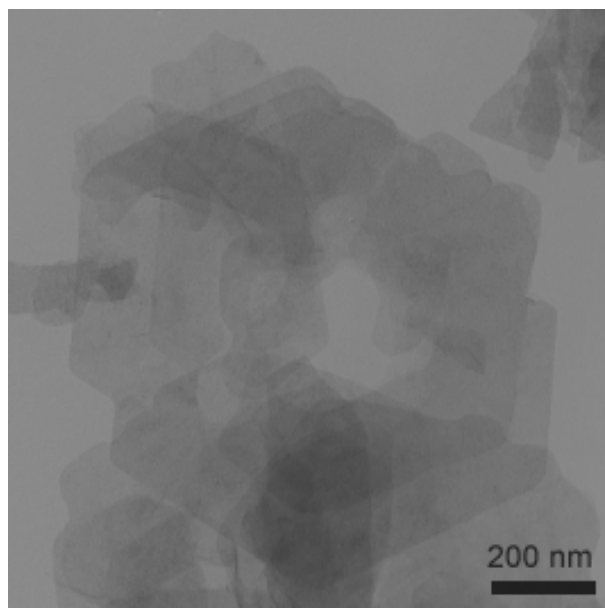

**Figure S3.** TEM image of MAC-R calcined at 500 °C for 6 h

## 2. Morphologic and textural characterization of Mg/Al-CO<sub>3</sub> LDH nanoflowers

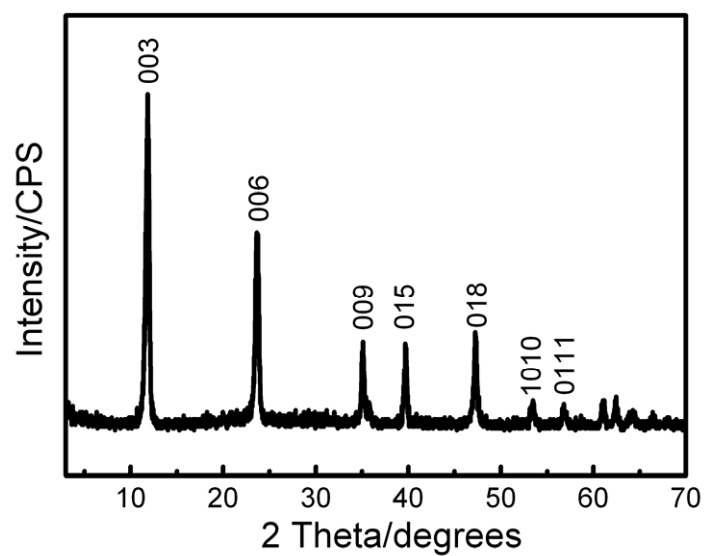

**Figure S4.** XRD pattern of MAC-F

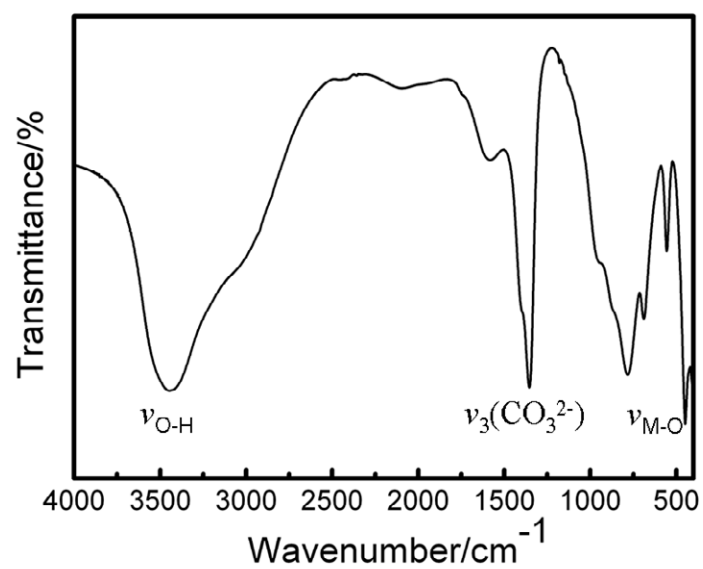

**Figure S5.** FT-IR pattern of MAC-F

### 3. Discussion of synthesis mechanism

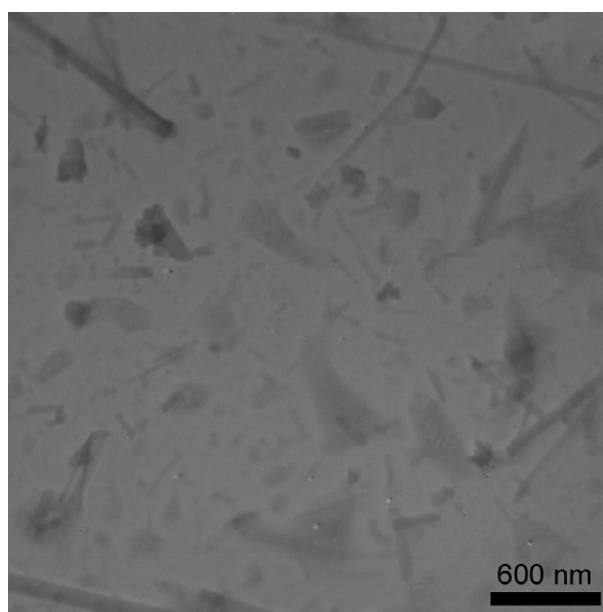

**Figure S6.** TEM image of MAC-R prepared after a reaction time of 40 min

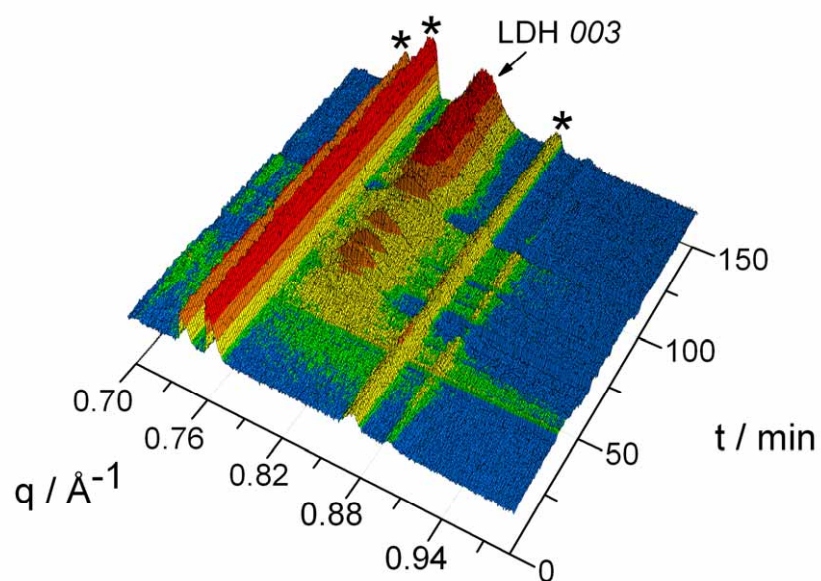

**Figure S7.** 3D stacked plot recorded for the transition of Mg10-NW into MAC-R. Reflections marked \* correspond to fluorescence from metals present inside the experimental hutch. After 150 min, the stirring mechanism jammed and no further data could be obtained.

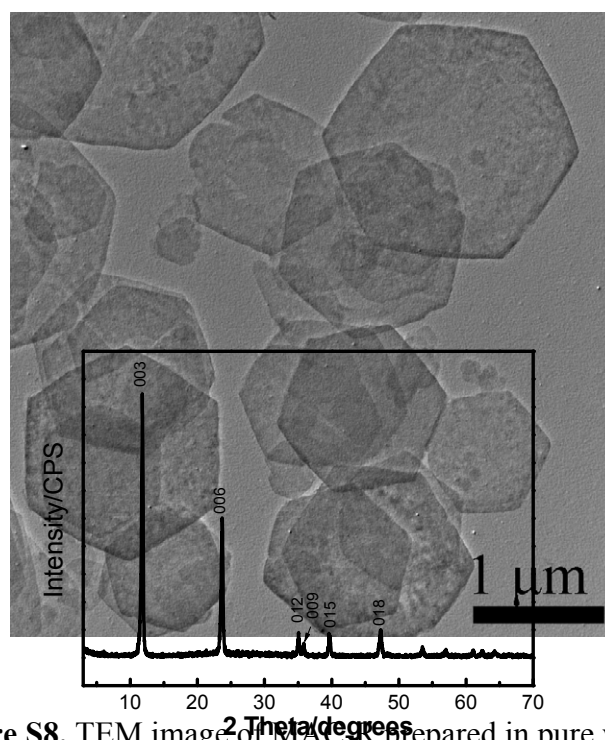

**Figure S8.** TEM image of MAC-R prepared in pure water

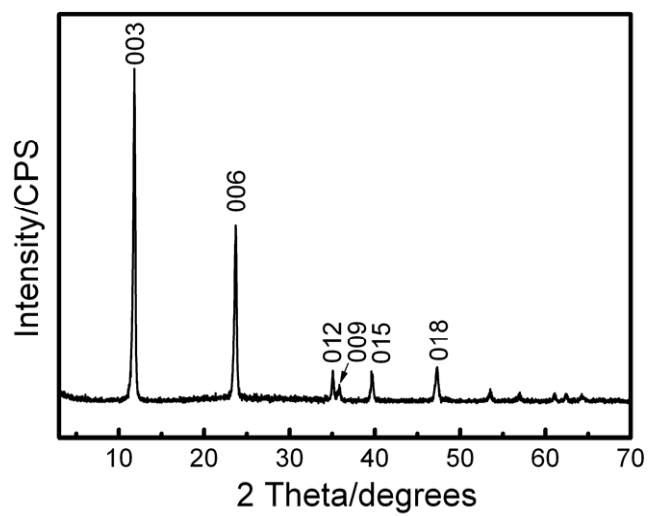

**Figure S9.** XRD pattern of MAC-P

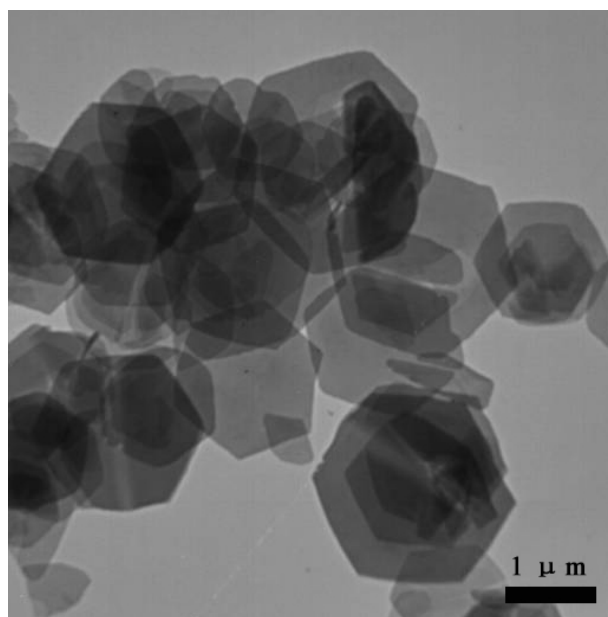

**Figure S10.** TEM image of MAC-P
